# Supplementary material
Source: PubMed Central journal article supplement (PMC6977810)
Supplement: 12264_2019_422_MOESM1_ESM.pdf [file 12264_2019_422_MOESM1_ESM.pdf]

## Supplementary Materials

### Ketamine Alleviates Fear Generalization through GluN2B-BDNF Signaling in

Mice

**Figure S1**

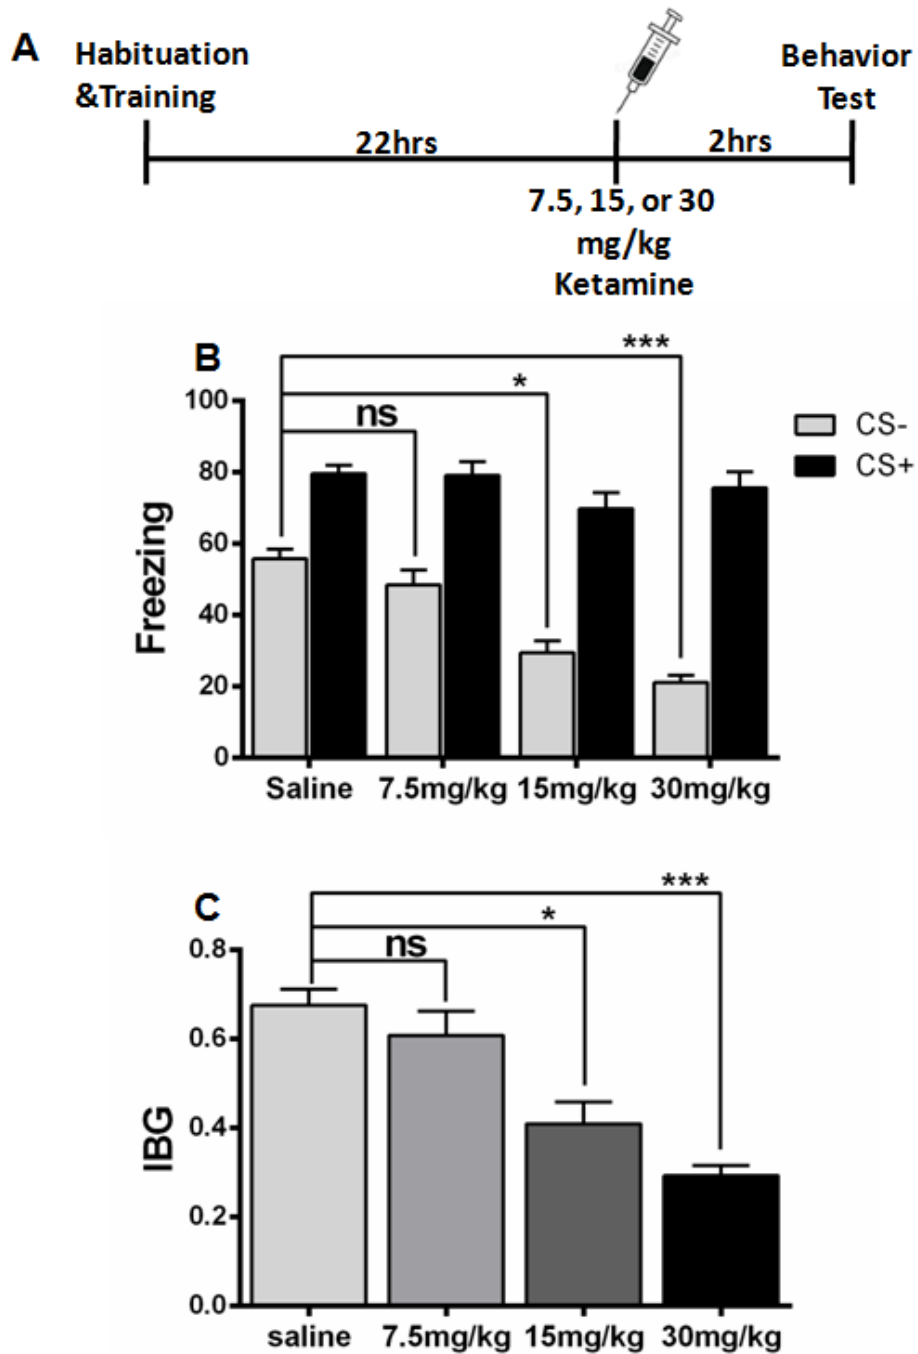

**Fig. S1 Dose-dependent response to ketamine.** **A** Experimental design. **B, C** Mice injected with 15 mg/kg and 30 mg/kg ketamine showed a significantly lower freezing response to the CS<sup>-</sup> tone and IBG level than the saline-treated group. However, those injected with 7.5 mg/kg ketamine did not show decreased freezing and IBG level. (*n* = 8 mice/group; error bars, ± SEM; \**P* <0.05, \*\*\**P* <0.001; IBG, index of behavior generalization.)
